1 **Title:** How phenotypic convergence arises in experimental evolution

2 **Running Title:** Experimental Evolution of Convergence

3 **Authors:** Pedro Simões<sup>1#\*</sup> & Inês Fragata<sup>1#\*</sup>, Josiane Santos<sup>1</sup>, Marta A. Santos<sup>1</sup>, Mauro  
4 Santos<sup>3</sup>, Michael R. Rose<sup>2</sup> & Margarida Matos<sup>1</sup>

**Affiliations:** <sup>1</sup>cE3c – Centre for Ecology, Evolution and Environmental Changes, Faculdade de Ciências, Universidade de Lisboa, Campo Grande, 1749-016 Lisboa, Portugal, Tel: +351 21 75 000 00; <sup>2</sup>Department of Ecology and Evolutionary Biology, University of California, Irvine, CA, USA.; <sup>3</sup>Departament de Genètica i de Microbiologia, Grup de Genòmica, Bioinformàtica i Biologia Evolutiva (GGBE), Universitat Autònoma de Barcelona, Spain.

\*Corresponding authors: PS: [pmsimoes@fc.ul.pt](mailto:pmsimoes@fc.ul.pt), IF: [irfragata@gmail.com](mailto:irfragata@gmail.com)

5 # both authors contributed equally to this work.

6 **Author Contributions:** P.S. and I.F. participated in the conception and design of the  
7 study, collected and analysed the data and drafted the manuscript. J.S. participated in  
8 the conception and design of the study, data collection and revised critically the  
9 manuscript. M.A.S. participated in data collection and revised critically the manuscript.  
10 M.S. and M.R.R. participated in the conception and design of the study, as well as  
11 substantively revising the manuscript. M.M. conceived and designed the study,  
12 coordinated the study and helped drafting the manuscript. All authors gave final  
13 approval for publication.

14 **Acknowledgments:** The authors thank Laurence D. Mueller for the first version of the  
15 script that was later adapted for the analyses of the present study. Two anonymous  
16 reviewers provided helpful comments on an earlier draft. This study was partially  
17 financed by “Fundação para a Ciência e a Tecnologia” (FCT) projects  
18 POCTI/BSE/33673/2000, POCI-PPCDT/BIA-BDE/55853/2004 and PTDC/BIA-  
19 BDE/65733/2006 and by the cE3c FCT Unit UID/BIA/00329/2013. PS and IF have  
20 postdoctoral FCT grants (SFRH/BPD/86186/2012 and within the project  
21 JPIAMR/0001/2016 respectively). MS is funded by grants CGL2017-89160P from  
22 Ministerio de Economía y Competitividad (Spain), and 2017SGR 1379 from Generalitat  
23 de Catalunya.

24 **Data Accessibility Statement:** Raw data will be available at the Dryad Digital  
25 Repository upon acceptance.

26 **Keywords:** Convergent Evolution; Experimental Evolution; *Drosophila subobscura*;  
27 Life-History traits; Long-term Evolution; Adaptation.

28 **Abstract**

29 Evolutionary convergence is a core issue in the study of adaptive evolution, as well as a  
30 highly debated topic at present. Few studies have analyzed this issue using a “real-time”  
31 or evolutionary trajectory approach. Do populations that are initially differentiated  
32 converge to a similar adaptive state when experiencing a common novel environment?  
33 *Drosophila subobscura* populations founded from different locations and years showed  
34 initial differences and variation in evolutionary rates in several traits during short-term  
35 (~20 generations) laboratory adaptation. Here we extend that analysis to 40 more  
36 generations to analyze (1) how differences in evolutionary dynamics between  
37 populations change between shorter and longer time spans, and (2) whether  
38 evolutionary convergence occurs after sixty generations of evolution in a common  
39 environment. We found substantial variation in longer-term evolutionary trajectories  
40 and differences between short and longer-term evolutionary dynamics. Though we  
41 observed pervasive patterns of convergence towards the character values of long-  
42 established populations, populations still remain differentiated for several traits at the  
43 final generations analyzed. This pattern might involve transient divergence, as we report  
44 in some cases, indicating that more generations should lead to final convergence. These  
45 findings highlight the importance of longer-term studies for understanding convergent  
46 evolution.

47

48

## 49 **Introduction**

50       Understanding how populations adapt to environmental challenges is becoming  
51 increasingly important in both evolutionary biology and conservation (Botero et al.  
52 2015; Franks and Hoffmann 2012). However, we are still unsure how predictable  
53 adaptation to novel environments is (Lachapelle et al. 2015; Lässig et al. 2017; Lenski  
54 et al. 2015; Orgogozo 2015; Wisser et al. 2013). Unpredictability in evolution can be  
55 caused by different genetic backgrounds due to prior evolutionary history (see Barton  
56 and Keightley 2002; Barrett and Schluter 2008; Hansen 2013), and stochastic events  
57 such as founder events, genetic drift, bottlenecks, etc. (see Lenormand et al. 2009).  
58 Furthermore, interactions between selection and genetic drift may also increase  
59 variation in evolutionary responses (e.g. Cohan 1984; Cohan and Hoffmann 1986;  
60 Santos et al. 2012).

61       An important question when different populations adapt to new environmental  
62 challenges is whether they will diverge or converge through time. Convergent evolution  
63 is expected to arise through the action of natural selection, erasing differences between  
64 populations (Endler 1986; Losos 2011; Stern 2013). Alternatively, differentiated  
65 populations could conceivably evolve increased differentiation when placed under  
66 similar selective regimes (Wright 1931; Cohan 1984; Whitlock et al. 1995). Discovering  
67 the constraints that produce either evolutionary convergence or evolutionary divergence  
68 is fundamental to ultimately understanding the foundations of adaptive evolution.

69       Experimental evolution is a powerful tool with which to address this problem,  
70 especially by studying the real-time evolutionary trajectories of different populations  
71 subjected to the same selective challenge. Several studies have observed convergent  
72 evolutionary responses in a new common environment (e.g. Travisano et al. 1995;

73 Teotónio and Rose 2000; 2002; Joshi et al. 2003; Simões et al. 2007, 2008; Teotónio et  
74 al. 2009; Santos et al. 2012; Fragata et al. 2014; Burke et al. 2016; Rebolleda-Gómez  
75 and Travisano 2019). Nevertheless, divergent evolutionary responses have also been  
76 observed (e.g. Cohan 1984; Cohan and Hoffmann 1986; Melnyk and Kassen 2011).  
77 Furthermore, several studies support the notion that the impact of evolutionary  
78 contingencies varies between traits closely or loosely related to fitness (Travisano et al.  
79 1995; Teotónio et al. 2002; Joshi et al. 2003; Simões et al. 2008, 2017). It is thus clear  
80 from experimental evidence that evolutionary contingencies have a role in shaping  
81 evolutionary responses.

82         An important question, seldom addressed in the literature (but see Burke et al.  
83 2016), is the effect of initial differentiation between populations on their long-term  
84 evolution. In particular, it is expected that different initial genetic backgrounds will have  
85 a higher impact during short-term evolution in a constant environment (Joshi et al.  
86 2003; Fragata et al. 2014; Burke et al. 2016). On the other hand, at longer evolutionary  
87 scales, the cumulative effects of genetic drift and other stochastic events acting on the  
88 evolving populations will likely have a higher impact on the evolutionary trajectories  
89 observed (e.g. see Brito et al. 2005; Lenormand et al. 2009). Furthermore, different  
90 levels of standing genetic variation and/or epistatic interactions can have an important  
91 impact on long-term evolution (Barrett and Schluter 2008; Goodnight 2015; Paixão and  
92 Barton 2016; see empirical examples in Barton and Keightley 2002; Hansen 2013;  
93 Wiser et al. 2013; Good and Desai 2015). This might produce differences between  
94 populations, even in populations subject to similar selective pressures, possibly through  
95 different timings in the deceleration of the evolutionary response over time, for example  
96 (Teotónio and Rose 2000; Gilligan and Frankham 2003; Simões et al. 2007; Khan et al.  
97 2011; Schoustra et al. 2012).

98 Long-term evolutionary dynamics have been mostly studied in microbial  
99 experimental evolution systems rather than in sexual organisms, due to the shorter  
100 generation time of the former. In the *E. coli* long-term evolution experiment performed  
101 in Lenski's lab, recent evidence indicates a deceleration of the evolutionary rate over  
102 50000 generations (Wiser et al. 2013; Lenski et al. 2015). Furthermore, and perhaps  
103 surprisingly, heterogeneity in evolutionary trajectories is still present after so many  
104 generations, in part due to differences in mutation rates (Lenski et al. 2015). Several  
105 studies with sexual organisms, though involving fewer generations, have also observed  
106 the slowing down of evolutionary responses to newly imposed selection regimes (e.g.  
107 Gilligan and Frankham 2003; Rose et al. 2004; Simões et al. 2007, see below). The  
108 expectation of a deceleration of laboratory evolutionary trajectories in sexual organisms  
109 is sometimes justified in terms of temporal exhaustion of additive genetic variance,  
110 although genomic scans in experimentally evolved *Drosophila* populations have found  
111 only limited evidence of fixed alleles following selection (Burke et al. 2010; Burke and  
112 Long 2012; Orozco-Terwengel et al. 2012; Long et al. 2015; Phillips et al. 2016; Seabra  
113 et al. 2018). In a previous study by our team, we found evidence for a deceleration in  
114 the evolutionary trajectory of fecundity in populations of *Drosophila subobscura*  
115 evolving for more than 80 generations in the lab environment (Simões et al. 2007).  
116 Teotónio and Rose (2000) also found this pattern of response in several *D.*  
117 *melanogaster* lines undergoing reverse selection in their ancestral environment. Gilligan  
118 and Frankham (2003) also reported a slowing down of the rate of adaptation to captivity  
119 after 87 generations in the lab by comparing *Drosophila* populations in different stages  
120 of adaptation. However, this pattern is not universal, as other experimental studies have  
121 not found such deceleration of the evolutionary response, even after a higher number of  
122 generations. One example of this is the work of Chippindale et al. (1997), who imposed

123 selection for accelerated development time in *D. melanogaster*. Nevertheless, studies of  
124 long-term experimental evolution in sexual species are scarce and have not specifically  
125 addressed the variation in evolutionary dynamics that might occur during evolution over  
126 the short term, relative to longer evolutionary time periods.

127 We have previously shown variation in the evolutionary response of several  
128 populations of *D. subobscura* during the first 20 generations of evolution in a new  
129 environment, the lab (Simões et al. 2008). These populations were founded from  
130 different nearby locations over several years. We observed higher variation in the  
131 evolutionary response for female starvation resistance, a trait likely more loosely related  
132 to fitness in our experimental setting. By contrast, patterns for fecundity traits, which  
133 are expected to be closer to fitness, were more repeatable. Importantly, the different  
134 starvation resistance patterns led in fact to convergence between populations. In this  
135 study we extend the earlier analysis to cover around forty additional generations. We  
136 address the following questions: (1) How much do evolutionary rates vary between  
137 short-term and longer-term evolution? (2) Do differences in evolutionary dynamics  
138 between populations change in the transition from earlier to later generations? (3) Is  
139 convergence observed after sixty generations of evolution in a common environment?

140 We expect that, during short-term evolution, variation in the initial genetic  
141 backgrounds will lead to disparate rates of adaptation to the new environment. Over the  
142 longer term, as the evolutionary response decelerates, differences between populations  
143 of contrasting initial genetic composition are likely to be reduced relative to those  
144 observed during short-term evolution, particularly if populations are evolving towards  
145 the same phenotypic optimum.  
146

147  
148  
149

## 150 **Materials and Methods**

151

### 152 Founding and Maintenance of the Laboratory populations

153

154 Five sets of wild-caught samples of *Drosophila subobscura* were analyzed in this  
155 study. These populations were founded in 1998 (NW populations; see Matos et al.  
156 2002), 2001 (AR and TW populations; see (Simões et al. 2007), and 2005 (FWA and  
157 NARA; see (Simões et al. 2008). NW, TW and FWA populations were collected from a  
158 pinewood near Sintra (Portugal), whereas AR and NARA populations were collected  
159 from a pinewood in Arrábida (also from Portugal, some 50 Km from Sintra, on the other  
160 margin of the Tagus river; see Simões et al. 2007, 2008). All populations were three-  
161 fold replicated two generations after founding (e.g., FWA<sub>1-3</sub> designating the three  
162 populations of FWA). A set of long-established laboratory populations (called “NB”,  
163 founded in 1990 from Sintra) was used as a control for all the experimental populations.  
164 NB populations were at their 90<sup>th</sup>, 136<sup>th</sup> and 181<sup>st</sup> laboratory generations at the time of  
165 foundation of the 1998, 2001 and 2005 collections, respectively.

166 All populations were maintained under the same laboratory environment with  
167 discrete generations of 28 days, reproduction close to peak fecundity, controlled  
168 temperature of 18°C, with a 12-h L: 12-h D photoperiod. Flies were kept in vials, with  
169 controlled densities for both adult (around 50 individuals per vial) and larval stages  
170 (around 80 per vial). At each generation, emergences from the several vials of each  
171 replicate population were randomized using CO<sub>2</sub> anesthesia. Census population sizes  
172 ranged between 600 and 1200 adults. To study the evolutionary trajectories during  
173 laboratory adaptation, all experimental populations and the controls were periodically  
174 assayed for several phenotypic traits (see below).

175

176

177 *Phenotypic Assays and Generations analyzed*

178 For the phenotypic assays, mated pairs of flies were transferred daily to fresh  
179 medium and the number of eggs laid per female was counted during the first 12 days  
180 since emergence. After the fecundity assay, each pair of flies was transferred to a vial  
181 containing plain agar medium to measure starvation resistance (with deaths checked  
182 every 6 h). Five characters were analyzed: age of first reproduction (number of days  
183 between emergence and the day of first egg laying), early fecundity (total number of  
184 eggs laid during the first week), peak fecundity (total number of eggs laid between days  
185 8 and 12), and female and male starvation resistance. Sample sizes ranged between 14  
186 and 24 pairs per replicate population and assay. All assays involved synchronous  
187 analyses with NB populations.

188 Periodical phenotypic assays were performed starting at generation 3 or 4 up to  
189 generation 58-60. All generations assayed for the several populations are presented in  
190 Table S1. We analyze here both short-term - ~20 generations - and a longer-term period  
191 - between ~20 and ~60 generations, here designated “long-term” - of laboratory  
192 evolution of these populations. We also analyzed the entire evolutionary trajectory,  
193 spanning the complete data set. The short-term data was studied in Simões et al. (2008)  
194 for a larger number of populations, the five sets of populations referred to above and an  
195 extra set of populations in each of the 2005 locations (details in Simões et al. 2008).  
196 Moreover, for NW there were five replicate populations with data on short term, but  
197 here we only analyze three replicate populations, for both short and long-term, as only  
198 these have data for more advanced generations. Finally, we expand our analyses to  
199 include male starvation resistance data, which was not analyzed in Simões et al. (2008).

200 In order to calculate the initial or final state for each replicate population, we  
201 calculated the mean value of the 2 (or 3) first (or last) generations by choosing 15



202 random individual data points (with replacement) of each generation involved. The  
203 initial generations used were the following: 4, 6 and 7 for AR and TW; 4 and 8 for NW;  
204 3, 6 and 10 for NARA and FWA. The final generations analyzed were: 48, 55 and 60  
205 for AR and TW; 52, 53 and 58 for NW; 49 and 58 for NARA and FWA.

206

### 207 Statistical Methods

208 To estimate the evolutionary trajectories for each population, in each assayed  
209 generation, we used the differences between individual data and the mean of the same-  
210 numbered NB replicate population (assayed synchronously with experimental  
211 populations; e.g. AR1-average NB1), see (Simões et al. 2008). This was done to remove  
212 the effect of possible temporal changes not related to laboratory adaptation such as  
213 trends due to environmental variation or to inadvertent evolutionary changes not  
214 intended in the study (e.g. due to slight changes of conditions in lab). This procedure  
215 also minimizes the effects of environmental heterogeneity between non-synchronous  
216 assays (see also Matos et al. 2002; Simões et al. 2007, 2008). Temporal performance of  
217 the control populations was generally quite stable across traits, allowing us to rule out  
218 undesirable sources of variation such as those due to further laboratory adaptation or  
219 inbreeding (see Fig S1).

220 Linear and linear-log models were tested for both periods separately and over the  
221 whole evolutionary trajectory of the populations (around 60 generations). Models were  
222 chosen according to their fit to the data based on  $R^2$  values (see Table S2). For the  
223 separate analyses of short-term and long-term periods, we chose the linear over the  
224 linear-log model as a compromise across populations and periods, since the same model  
225 had to be applied to allow for direct comparisons between periods (e.g. for the tests in

226 Table 1 and 2). For the analysis of overall trajectories, the linear-log model was chosen,  
227 as it generally presented a better fit than the linear model (see Table S2).

228

### 229 Bootstrap Techniques

230 Variation in the slope of evolutionary response between sets of populations and periods  
231 was studied using bootstrap techniques as in Simões et al. (2008). Briefly, for each  
232 replicate population we estimated the intercept ( $\hat{\beta}_0$ ), evolutionary slope ( $\hat{\beta}_1$ ) and the  
233 residuals of each point ( $\epsilon$ ) using a simple linear regression. In each iteration of the  
234 bootstrap, a new vector of phenotypic data was created by resampling the residuals,  
235 with replacement ( $\epsilon^*$ ) and employing the following formula to calculate a new  
236 phenotypic value for each data point used:

$$237 \quad 1) \quad y^* = \hat{\beta}_0 + \hat{\beta}_1 \times \text{Generation} + \epsilon^*$$

238 After this, a new slope ( $\beta_1^*$ ) and intercept ( $\beta_0^*$ ) were estimated through a linear  
239 regression. For the linear-log model the same analysis was applied using the natural  
240 logarithm of the generation. A total of 10000 slopes were generated for each replicate  
241 population. All analyses testing differences between slopes were done using these  
242 values.

243 To compare two sets of populations from the same location in different years, we  
244 calculated the mean of each set involved in the comparison (by randomly sampling one  
245 slope from each replicate population) and the difference between them (e.g. comparison  
246 Arrábida 2001 vs. Arrábida 2005:  $((AR_1\beta_1^* + AR_2\beta_1^* + AR_3\beta_1^*)/3) -$   
247  $((NARA_1\beta_1^* + NARA_2\beta_1^* + NARA_3\beta_1^*)/3)$ ). This process was repeated 10000 times.  
248 Statistical significance was assessed by estimating the fraction of these 10000  
249 differences that were greater than zero. Two times this fraction or 1 minus two times  
250 this fraction (whichever is less) corresponds to the *P*-value. To compare differences

251 between the two locations we used all 2001 and 2005 replicate populations from each  
252 location. NW data was not included as there were no corresponding populations  
253 founded in Arrábida in 1998. We calculated the location means using data of six  
254 replicate populations (e.g. FWA<sub>1-3</sub> and TW<sub>1-3</sub> for the Sintra slopes), again using random  
255 samples of slopes from each replicate population, as above. Differences between the  
256 short and long-term evolutionary response for each set of populations were also  
257 assessed (e.g. comparison of TW<sub>1-3</sub> short-term slopes vs TW<sub>1-3</sub> long-term slopes). We  
258 further analyzed whether differences between periods varied between populations  
259 founded from distinct years or locations. These comparisons followed the same  
260 rationale as above (e.g. comparison short vs long-term for Arrábida 2001 vs Arrábida  
261 2005:  $((AR_1\beta_1^*{}_S + AR_2\beta_1^*{}_S + AR_3\beta_1^*{}_S)/3 - (NARA_1\beta_1^*{}_S + NARA_2\beta_1^*{}_S +$   
262  $NARA_2\beta_1^*{}_S)/3) - ((AR_1\beta_1^*{}_L + AR_2\beta_1^*{}_L + AR_3\beta_1^*{}_L)/3 - (NARA_1\beta_1^*{}_L + NARA_2\beta_1^*{}_L +$   
263  $NARA_2\beta_1^*{}_L)/3)$ ). This analysis was performed with 10000 random samples and tested as  
264 described above.

265 To test whether populations differed in the initial or final performance, 10000  
266 comparisons between years and locations were assessed using the same rationale as  
267 above.

268 When testing for differences between populations statistical significance is presented  
269 both with and without False Discovery Rate (FDR) correction for five tests (theorem 1.3  
270 Benjamini and Yekutieli 2001). Marginally significant results after FDR correction will  
271 also be considered when the general reading justifies, i.e. if there are consistent patterns  
272 across populations. This is a compromise, as being too conservative also has drawbacks,  
273 given that the focus of this study is not on single tests but rather to analyze patterns  
274 across comparisons.

275 All analyses were performed using R version 3.3.1 (R Core Team 2018), package  
276 reshape2 (Wickham 2007) and visualization was done using ggplot2 package (Wickham  
277 2009).

278

## 279 **Results**

### 280 *Initial differences between populations*

281 The experimental populations were clearly differentiated from the control  
282 populations in the initial performance of fecundity traits, though less so for starvation  
283 resistance (Fig 1 and 2). NW populations performed significantly better than the other  
284 Sintra populations, both in age of first reproduction and early fecundity, whereas they  
285 performed worse for male starvation resistance (see Table S3 and Figs 1 and 2). Most  
286 populations from different years showed significant differences in the initial  
287 performance for peak fecundity and female starvation resistance. On the other hand, no  
288 significant differences were found between locations for any trait (see Table S3).

289

### 290 *Short-term Evolutionary Dynamics*

291 In general, fecundity-related traits, particularly early fecundity, show a clear  
292 evolutionary increase in performance during short-term evolution across populations,  
293 with a tendency to converge to control values, although at different rates (see Fig 1 and  
294 below; see also Fig S2, for data on the mean and variation of slopes of replicate  
295 populations). In contrast, patterns for starvation resistance are less consistent. In fact,  
296 male starvation resistance does not show a noticeable evolutionary response, although  
297 there is a suggestion of increased starvation across generations for all sets of  
298 populations except AR (see Fig 2 and Fig S2). The evolutionary response of female  
299 starvation resistance varies greatly among sets of populations with patterns of stasis

300 (AR and TW), decreased (FWA and NARA) and increased performance (for NW). In  
301 spite of these differences, the patterns are again of convergence to control values (see  
302 Fig 2, S2 and below).

303 When comparing the evolutionary response among populations, we observe  
304 significant differences of slopes between years (see Table 1). This variation is  
305 particularly evident for female starvation resistance, in agreement with our previous  
306 analysis (Simões et al. 2008). On the other hand, for male starvation resistance no  
307 significant variation in the evolutionary response was found. Significant differences  
308 between locations were only observed for peak fecundity (see Table 1).

309 Interestingly, of the eight comparisons showing significant (or at least marginally  
310 significant, after FDR correction) differences between populations in short-term  
311 dynamics across all assayed traits (Table 1), six of these showed also significant  
312 variation in initial performance (cf. Table 1 and Table S3). This concordance  
313 corresponded to a reduction of differences between populations through time for age of  
314 first reproduction and female starvation resistance. In contrast, for early fecundity, a  
315 higher initial performance of NW relative to TW or FWA was followed by faster  
316 improvement through time increasing the initial differences, leading at least to transient  
317 divergence between populations (Table 1 and Table S3, Fig 1 and 2).

318

### 319 *Long-term Evolutionary Dynamics*

320 In each set of populations there was a clear variation of evolutionary rates (slopes)  
321 between the short-term and the long-term period for age of first reproduction, early  
322 fecundity and female starvation resistance (Table S4). This corresponded to a general  
323 slowing down of the evolutionary response as populations tended to converge to the

324 control values (see Figs 1, 2 and S2; Fig S3 shows the same pattern in the evolutionary  
325 trajectories using all generations).

326 Differences in evolutionary dynamics between sets of populations were more evident  
327 in the long-term than in the short-term evolutionary response for several traits,  
328 particularly for early fecundity (see Table 1; Figs 1, 2 and S2). For this trait, a  
329 significant effect of location was due to a higher evolutionary rate in Sintra populations.  
330 Also, several comparisons showed significant effects of year, due in part to a lower  
331 slowing down of the response of the 2001 populations. On the other hand, differences  
332 between populations in the evolutionary response of female starvation resistance  
333 decreased in this period with only two significant effects in five comparisons– see Table  
334 1. These significant effects involved comparisons with NW, which showed a clear drop  
335 in performance during this later period (see Fig 2).

336 When comparing the variation in evolutionary rates of the different sets of  
337 populations between the two periods (short vs. long-term evolution), early fecundity and  
338 female starvation resistance showed the greatest differences between populations, due to  
339 the above mentioned differential slowing down of response for early fecundity during  
340 long-term evolution and to the reported high variation in evolutionary rates seen in the  
341 short term evolution of female starvation resistance (Figs 1 and 2, Table 2). Importantly,  
342 for early fecundity, populations with higher short-term evolutionary rates (NW and the  
343 two 2005 populations) were also those with a stronger slowing down in the long-term  
344 period (Fig 1), which is expected under convergent evolution (see below).

345

#### 346 *Final differences between populations*

347 In more advanced generations, there was a loss of the initial differences between  
348 populations for several comparisons, as expected if full convergence occurs (see Table

349 S3). This was observed between NW and TW for all fecundity traits, between NW and  
350 FWA for age of first reproduction, and between the 2001 and 2005 populations for  
351 female starvation resistance (Table S3 and Figs. 1 and 2). Nevertheless, significant  
352 differences in final performance were also found for several comparisons (see Table  
353 S3). In some cases, differentiation was also present at the start. Three temporal patterns  
354 were observed taking into account initial, intermediate, and final values (see Table S5):  
355 1- continuous reduction of differences (NW versus TW for male starvation resistance);  
356 2- increased differences through time (TW versus FWA for peak fecundity); 3-  
357 differentiation at the initial and final generations but with intermediate loss of  
358 differentiation (NW versus FWA for early fecundity and female starvation resistance).  
359 Finally, in other comparisons there was a significant (or at least marginally significant  
360 after FDR correction) differentiation between populations at the later stage of  
361 adaptation, not present at the start (Table S3). In this case two temporal patterns were  
362 observed (see Fig 1 and Table 1, S3 and S5): 1- higher differences at the end than at  
363 intermediate or initial generations (Arrábida versus Sintra populations for early  
364 fecundity and NW versus FWA for peak fecundity); 2 - - higher differences at  
365 intermediate generations than at the end of the study due to a differential slowing down  
366 of the evolutionary rate (between the two sets of Arrábida populations for age of first  
367 reproduction and early fecundity; in both cases differences are marginally significant  
368 after FDR correction).

369

### 370 *Overall Evolutionary Dynamics*

371 Evolutionary trajectories across the entire time span confirm a general deceleration  
372 of the evolutionary response through time, as populations evolved towards the control  
373 values (see Fig S3). This led to a generally better fit of the overall evolutionary

374 trajectory to a linear-log model relative to a linear one, particularly for fecundity-related  
375 data (see Table S2). Differences between sets of populations in the overall evolutionary  
376 response were due to variable changes between short and long periods, leading to  
377 pervasive contrasts, particularly for early fecundity (see Table 1 and S6).

378

## 379 **Discussion**

380 Evolutionary convergence is a core expectation for adaptive evolution in a  
381 similar environment (Losos 2011; Stern 2013). With a smooth fitness landscape, that  
382 lacks multiple peaks, populations will tend to evolve to the same outcome (Wright  
383 1931). In such cases, the outcome of evolution will be predictable. The predictability of  
384 evolution is an issue of much interest at present (e.g. de Visser and Krug 2014;  
385 Orgogozo 2015). Experimental evolution is a great tool for testing whether adaptive  
386 evolution involves smooth or rugged landscapes, as it allows us to study the fate of  
387 populations initially differentiated when subject to similar selective pressures,  
388 especially whether they evolve towards similar or different fitness values (Fragata et al.  
389 2018; Matos et al. 2015; Orgogozo 2015; Rebolleda-Gómez and Travisano 2019). Here  
390 we add to the previous Simões et al. (2008) study the analysis of c. 40 more generations  
391 of laboratory adaptation, in order to determine whether: 1) longer-term evolution leads  
392 to similar outcomes as short-term evolution; 2) populations will ultimately tend to  
393 converge or show more complex evolutionary patterns.

394 In this study we found a general pattern of convergent evolution, with clear changes  
395 in the evolutionary rates between the short-term (~20 generations) and longer-term (~60  
396 generations) periods. We observed a slowing down of the evolutionary response  
397 through time for several traits as populations approached the evolutionary equilibria of  
398 long-established populations. Empirical evidence for deceleration of evolutionary rate



399 has been observed in other experimental studies using both asexual (Wiser et al. 2013;  
400 Lenski et al. 2015) and sexual organisms (Gilligan and Frankham 2003; Simões et al.  
401 2007).

402 We also observed that the differences between short-term and longer-term dynamics  
403 were trait and population specific. Whereas differences in the early-fecundity response  
404 between sets of populations increased from short- to long-term evolution, the inverse  
405 pattern was observed for female starvation resistance. The source of differences  
406 between populations also varied between traits. In the case of early fecundity, trajectory  
407 variation was due to a continuous increase in performance of the 2001 populations, even  
408 during long-term evolution, contrasting with the 1998 and 2005 populations, where  
409 quicker short-term evolution was followed by a slowing of the evolutionary response  
410 after generation 20. These differences are consistent with convergent evolution, as faster  
411 evolution in an earlier period is followed by a plateauing, while slower evolution  
412 corresponds to a steadier evolutionary rate throughout generations. Such contrasting  
413 evolutionary dynamics led to an interesting pattern: an intermediate phase of transient  
414 divergence was followed in the long-term by a partial convergence among evolving  
415 populations. In contrast, for female starvation resistance there were striking differences  
416 in the evolutionary trajectories during short-term evolution, with increase, decrease, or  
417 stasis contingent on the degree of initial differentiation from controls (see also Simões  
418 et al. 2008). For this trait, convergence was fast between all populations. These patterns  
419 were followed in general by a reduction of differences between evolutionary trajectories  
420 over the longer time period analyzed. The exception was the NW populations, which  
421 presented an initial positive trend, unique across populations (see also Matos et al.  
422 2004), followed by a negative long-term trend. Nevertheless, despite the different

423 underlying evolutionary dynamics, both early fecundity and female starvation resistance  
424 show a general pattern that suggests convergence in longer-term periods.

425 It is an inherent expectation of convergent evolution that there will be a negative  
426 association between initial state and subsequent evolutionary rates of populations  
427 adapting to a new environment (Simões et al. 2007). This expectation was confirmed  
428 for *D. subobscura* populations with clear initial historical differentiation, founded from  
429 contrasting latitudes of the European cline (Fragata et al. 2014). In that study fast  
430 convergence was observed after only 14 generations in a common environment. In our  
431 study, evidence of such an association was only found for age of first reproduction and  
432 female starvation resistance for the short-term dynamics. Even so, for female starvation  
433 resistance the overall trend was not of convergence in the case of NW populations (see  
434 above). The relative lack of such overall and rapid convergence in our study might be  
435 due to the smaller degree of initial differentiation of these populations, with greater  
436 sampling effects (Santos et al. 2012).

437 If full convergence occurs, an obvious corollary is that populations will not be  
438 differentiated as an outcome of evolution in a common environment. This expectation  
439 was not entirely met in our study, as several populations remained differentiated for  
440 some traits after sixty generations of evolution. In this context, several patterns emerged  
441 when comparing dynamics between different populations: (1) continuous reduction of  
442 differences indicating partial convergence (for male starvation resistance); (2)  
443 continuous divergence between populations (for early and peak fecundity); (3) transient  
444 divergence followed by partial convergence (for age of first reproduction and early  
445 fecundity) or (4) transient convergence followed by later divergence (for early fecundity  
446 and female starvation resistance). Teotónio and his collaborators (Teotónio et al. 2002;  
447 Teotónio and Rose 2000) performed a reverse evolution study during 50 generations

448 involving many genetically differentiated *Drosophila melanogaster* populations. They  
449 found that populations converged to ancestral values, but this trend was not general as it  
450 varied with the previous history and the trait studied. They concluded that populations  
451 converged to similar fitness values to a larger extent than other characters did. In  
452 contrast, in our study we did not see any clear relation between the extent of  
453 convergence and how the traits analyzed were presumed to determine fitness. In fact,  
454 several populations remained differentiated for early fecundity, a trait that is under  
455 strong selection in our environment with clear and consistent improvement across many  
456 independent studies (Fragata et al. 2014; Matos et al. 2002; Matos et al. 2004; Simões et  
457 al. 2007; Simões et al. 2008). Given our interpretation of transient divergence and  
458 partial convergence in some of these populations, it is possible that the time span of the  
459 study was not sufficient to allow for full convergence in some cases, convergence that  
460 might ultimately occur over more generations of evolution.

461 We observed considerable differences between short-term and longer-term dynamics  
462 in all our populations, which raises questions about predicting long-term evolution from  
463 short-term evolution. This contrasts with the study of Burke et al. (2016), which  
464 suggests that short-term evolution is predictive of longer evolutionary time periods. In  
465 that study recently selected *D. melanogaster* populations converged to the trait values of  
466 other independently derived populations evolving in a similar selection regime for a  
467 longer time scale, regardless of the evolutionary history of the populations studied.  
468 However, different time scales were involved, as the shorter-term evolutionary  
469 responses of that study were sometimes more than 100 generations in duration, with  
470 long-term evolution approaching 1,000 generations. In general, the fact that our study  
471 showed such differentiated outcomes and complex evolutionary patterns highlights the

472 importance of characterizing extended periods of experimental evolution and the  
473 possible pitfalls of predicting evolution from short-term adaptive patterns.

474

## 475 **Conclusions**

476 We here showed that after 60 generations of evolution in a common environment,  
477 *Drosophila subobscura* populations remain differentiated for several traits. Noticeably,  
478 this was observed even for life-history traits that are clearly under selection in our lab.  
479 In this context, we found evidence for transient divergence, as a result of heterogeneity  
480 in evolutionary rates through time, occurring under a general scenario of convergence.  
481 Ultimately, we conclude that extrapolating from short-term evolutionary patterns to  
482 longer evolutionary periods might be risky, particularly if one is interested in predicting  
483 the outcomes of evolution.

484

## 485 **Literature Cited**

- 486 Barrett, R. D. H., and D. Schluter. 2008. Adaptation from standing genetic variation.  
487 Trends Ecol. Evol. 23:38–44.
- 488 Barton, N. H., and P. D. Keightley. 2002. Understanding quantitative genetic variation.  
489 Nat. Rev. Genet. 3:11–21.
- 490 Benjamini, Y., and D. Yekutieli. 2001. The control of the false discovery rate in  
491 multiple testing under dependency. Ann. Stat. 29:1165–1188.
- 492 Botero, C. A., F. J. Weissing, J. Wright, and D. R. Rubenstein. 2015. Evolutionary  
493 tipping points in the capacity to adapt to environmental change. Proc. Natl. Acad.  
494 Sci. USA 112:184–189.

- 495 Brito, R. A., L. S. Pletscher, and J. M. Cheverudi. 2005. the Evolution of Genetic  
496 Architecture. I. Diversification of Genetic Backgrounds By Genetic Drift.  
497 Evolution 59:2333–2342.
- 498 Burke, M., J. Dunham, P. Shahrestani, K. Thornton, M. Rose, and A. Long. 2010.  
499 Genome-wide analysis of a long-term evolution experiment with *Drosophila*.  
500 Nature 467:587–590.
- 501 Burke, M. K., T. T. Barter, L. G. Cabral, J. N. Kezos, M. A. Phillips, G. A. Rutledge, K.  
502 H. Phung, R. H. Chen, H. D. Nguyen, L. D. Mueller, and M. R. Rose. 2016. Rapid  
503 divergence and convergence of life-history in experimentally evolved *Drosophila*  
504 *melanogaster*. Evolution 70:2085–2098.
- 505 Burke, M. K., and A. D. Long. 2012. What paths do advantageous alleles take during  
506 short-term evolutionary change? Mol. Ecol. 21:4913–4916.
- 507 Chippindale, A. K., J. A. Alipaz, H.-W. Chen, and M. R. Rose. 1997. Experimental  
508 Evolution of Accelerated Development in *Drosophila*. 1. Developmental Speed and  
509 Larval Survival. Evolution 51:1536–1551.
- 510 Cohan, F. M. 1984. Can Uniform Selection Retard Random Genetic Divergence  
511 Between Isolated Conspecific Populations? Evolution 38:495–504.
- 512 Cohan, F. M., and A. A. Hoffmann. 1986. Genetic divergence under uniform selection.  
513 II. Different responses to selection for knockdown resistance to ethanol among  
514 *Drosophila melanogaster* populations and their replicate lines. Genetics 114:145–  
515 164.
- 516 de Visser, J. A. G. M., and J. Krug. 2014. Empirical fitness landscapes and the  
517 predictability of evolution. Nat. Rev. Genet. 15:480–490.

- 518 Endler, J. A. 1986. *Natural Selection in the Wild*. Princeton University Press.
- 519 Fox, C. W., J. D. Wagner, S. Cline, F. A. Thomas, and F. J. Messina. 2011. Rapid  
520 Evolution of Lifespan in a Novel Environment: Sex-Specific Responses and  
521 Underlying Genetic Architecture. *Evol. Biol.* 38:182–196.
- 522 Fragata, I., P. Simões, M. Lopes-Cunha, M. Lima, B. Kellen, M. Bárbaro, J. Santos, M.  
523 R. Rose, M. Santos, and M. Matos. 2014. Laboratory selection quickly erases  
524 historical differentiation. *PLoS One* 9:e96227.
- 525 Fragata, I., P. Simões, M. Matos, E. Szathmáry, and M. Santos. 2018. Playing evolution  
526 in the laboratory: From the first major evolutionary transition to global warming.  
527 *Epl* 122:3.
- 528 Franks, S. J., and A. A. Hoffmann. 2012. *Genetics of Climate Change Adaptation*.  
529 *Annu. Rev. Genet* 46:185–208.
- 530 Garland, T., and M. R. Rose (eds). 2009. *Experimental Evolution: Concepts, Methods,*  
531 *and Applications of Selection Experiments*. University of California Press, Los  
532 Angeles, USA.
- 533 Gilligan, D. M., and R. Frankham. 2003. Dynamics of genetic adaption to captivity.  
534 *Conserv. Genet.* 4:189–197.
- 535 Good, B. H., and M. M. Desai. 2015. The impact of macroscopic epistasis on long-term  
536 evolutionary dynamics. *Genetics* 199:177–190.
- 537 Goodnight, C. J. 2015. Long-term selection experiments: Epistasis and the response to  
538 selection. Pp. 1–18 *in* J. H. Moore and S. M. Williams, eds. *Epistasis: Methods and*  
539 *protocols*. Springer Science+Business Media New York.

- 540 Hansen, T. F. 2013. Why epistasis is important for selection and adaptation. *Evolution*  
541 67:3501–3511.
- 542 Joshi, A., R. B. Castillo, and L. D. Mueller. 2003. The contribution of ancestry, chance,  
543 and past and ongoing selection to adaptive evolution. *J. Genet.* 82:147–162.
- 544 Kawecki, T. J., and F. Mery. 2006. Genetically idiosyncratic responses of *Drosophila*  
545 *melanogaster* populations to selection for improved learning ability. *J. Evol. Biol.*  
546 19:1265–1274.
- 547 Khan, A. I., D. M. Dinh, D. Schneider, R. E. Lenski, and T. F. Cooper. 2011. Negative  
548 epistasis between beneficial mutations in an evolving bacterial population. *Science*  
549 332:1193–1196.
- 550 Lachapelle, J., J. Reid, and N. Colegrave. 2015. Repeatability of adaptation in  
551 experimental populations of different sizes. *Proc. R. Soc. B* 282:20143033.
- 552 Lässig, M., V. Mustonen, and A. M. Walczak. 2017. Predicting evolution. *Nat. Ecol.*  
553 *Evol.* 1:0077.
- 554 Lenormand, T., D. Roze, and F. Rousset. 2009. Stochasticity in evolution. *Trends Ecol.*  
555 *Evol.* 24:157–165.
- 556 Lenski, R. E., M. J. Wiser, N. Ribeck, Z. D. Blount, R. Maddamsetti, A. R. Burmeister,  
557 E. J. Baird, and J. Bundy. 2015. Sustained fitness gains and variability in fitness  
558 trajectories in the long-term evolution experiment with *Escherichia coli*. *Proc. R.*  
559 *Soc. B* 282:20152292.
- 560 Long, A., G. Liti, A. Luptak, and O. Tenaillon. 2015. Elucidating the molecular  
561 architecture of adaptation via evolve and resequence experiments. *Nat. Rev. Genet.*

562 16:567–582.

563 Losos, J. B. 2011. Convergence, adaptation, and constraint. *Evolution* 65:1827–1840.

564 Matos, M., T. Avelar, and M. R. Rose. 2002. Variation in the rate of convergent

565 evolution: adaptation to a laboratory environment in *Drosophila subobscura*. *J.*

566 *Evol. Biol.* 15:673–682.

567 Matos, M., P. Simões, A. Duarte, C. Rego, T. Avelar, and M. R. Rose. 2004.

568 Convergence to a novel environment: comparative method versus experimental

569 evolution. *Evolution* 58:1503–1510.

570 Matos, M., P. Simões, M. A. Santos, S. G. Seabra, G. S. Faria, and F. Vala. 2015.

571 History, chance and selection during phenotypic and genomic experimental

572 evolution: replaying the tape of life at different levels. *Front. Genet.* 6:71.

573 Melnyk, A. H., and R. Kassen. 2011. Adaptive landscapes in evolving populations of

574 *Pseudomonas fluorescens*. *Evolution* 65:3048–3059.

575 Orgogozo, V. 2015. Replaying the tape of life in the twenty-first century. *Interface*

576 *Focus* 5:20150057.

577 Orozco-Terwengel, P., M. Kapun, V. Nolte, R. Kofler, T. Flatt, and C. Schlötterer.

578 2012. Adaptation of *Drosophila* to a novel laboratory environment reveals

579 temporally heterogeneous trajectories of selected alleles. *Mol. Ecol.* 21:4931–

580 4941.

581 Paixão, T., and N. H. Barton. 2016. The effect of gene interactions on the long-term

582 response to selection. *Proc. Natl. Acad. Sci.* 113:4422–4427.

583 Phillips, M. A., A. D. Long, Z. S. Greenspan, L. F. Greer, M. K. Burke, B.



- 584 Villeponteau, K. C. Matsagas, C. L. Rizza, L. D. Mueller, and M. R. Rose. 2016.  
585 Genome-wide analysis of long-term evolutionary domestication in *Drosophila*  
586 *melanogaster*. *Sci. Rep.* 6:39281.
- 587 R Core Team. 2018. R: A Language and Environment for Statistical Computing.
- 588 Rebolleda-Gómez, M., and M. Travisano. 2019. Adaptation, chance, and history in  
589 experimental evolution reversals to unicellularity. *Evolution* 73:73–83.
- 590 Rose, M. R., H. B. Passananti, and M. Matos. 2004. Methuselah Flies: A Case Study in  
591 the Evolution of Aging. World Scientific, Singapore.
- 592 Santos, J., M. Pascual, P. Simões, I. Fragata, M. Lima, B. Kellen, M. Santos, A.  
593 Marques, M. R. Rose, and M. Matos. 2012. From nature to the laboratory: the  
594 impact of founder effects on adaptation. *J. Evol. Biol.* 25:2607–2622.
- 595 Schoustra, S. E., D. Punzalan, R. Dali, H. D. Rundle, and R. Kassen. 2012. Multivariate  
596 Phenotypic Divergence Due to the Fixation of Beneficial Mutations in  
597 Experimentally Evolved Lineages of a Filamentous Fungus. *PLoS One* 7(11):  
598 e50305.
- 599 Seabra, S. G., I. Fragata, M. A. Antunes, G. S. Faria, M. A. Santos, V. C. Sousa, P.  
600 Simões, and M. Matos. 2018. Different genomic changes underlie adaptive  
601 evolution in populations of contrasting history. *Mol. Biol. Evol.* 35:549–563.
- 602 Simões, P., I. Fragata, S. Seabra, G. S. Faria, M. Santos, M. R. Rose, M. Santos, and M.  
603 Matos. 2017. Predictable phenotypic, but not karyotypic, evolution of historically  
604 differentiated populations. *Sci. Rep.* 7:913.
- 605 Simões, P., M. R. Rose, A. Duarte, R. Gonçalves, and M. Matos. 2007. Evolutionary

- 606 domestication in *Drosophila subobscura*. *J. Evol. Biol.* 20:758–766.
- 607 Simões, P., J. Santos, I. Fragata, L. D. Mueller, M. R. Rose, and M. Matos. 2008. How  
608 repeatable is adaptive evolution? The role of geographical origin and founder  
609 effects in laboratory adaptation. *Evolution* 62:1817–1829.
- 610 Stern, D. L. 2013. The genetic causes of convergent evolution. *Nat. Rev. Genet.*  
611 14:751–764.
- 612 Teotónio, H., I. M. Chelo, M. Bradić, M. R. Rose, and A. D. Long. 2009. Experimental  
613 evolution reveals natural selection on standing genetic variation. *Nat. Genet.*  
614 41:251–257.
- 615 Teotónio, H., M. Matos, and M. Rose. 2002. Reverse evolution of fitness in *Drosophila*  
616 *melanogaster*. *J. Evol. Biol.* 15:608–617.
- 617 Teotónio, H., and M. R. Rose. 2000. Variation in the reversibility of evolution. *Nature*  
618 408:463–466.
- 619 Travisano, M., J. A. Mongold, A. F. Bennett, and R. E. Lenski. 1995. Experimental  
620 Tests of the Roles of Adaptation, Chance, and History in Evolution. *Science*  
621 267:87–90.
- 622 Whitlock, M. C., P. C. Phillips, F. B. Moore, and S. J. Tonsor. 1995. Multiple Fitness  
623 Peaks and Epistasis. *Annu. Rev. Ecol. Syst.* 26:601–629.
- 624 Wickham, H. 2009. *ggplot2: Elegant Graphics for Data Analysis*. Springer-Verlag, New  
625 York.
- 626 Wickham, H. 2007. Reshaping Data with the reshape Package. *J. Stat. Softw.* 21:1–20.

627 Wisner, M. J., N. Ribeck, R. E. Lenski, J. S. Littell, C. J. Muller, K. A. Dunne, A. V

628 Vecchia, L. R. Leung, Y. Qian, Y. Zhang, J. L. Betancourt, and G. J. McCabe.

629 2013. Long-Term Dynamics of Adaptation in Asexual Populations. *Science*

630 342:1364–1367.

631 Wright, S. 1931. Evolution in Mendelian Populations. *Genetics* 16:97–159.

632

633

## 634 **Figure Legends**

635 Figure 1 - Short and long-term evolutionary trajectories for fecundity related traits for  
636 the 5 sets of populations studied. Age of first reproduction (number of days), Early  
637 fecundity (number of eggs), Peak fecundity (number of eggs) are represented. Points  
638 represent mean values for each replicate at each generation. Dashed lines indicate short  
639 term period and full line indicates long-term period. Shaded area represents 95%  
640 confidence intervals estimated from the regression, using mean replicate population  
641 values.

642

643 Figure 2 - Short and long-term evolutionary trajectories for female and male starvation  
644 resistance for the 5 sets of populations studied. Male starvation resistance (in hours) and  
645 Female starvation resistance (in hours) are represented. Points represent mean value for  
646 each replicate at each generation. Dashed lines indicate short term period and full line  
647 indicates long-term period. Shaded area represents 95% confidence intervals estimated  
648 from the regression, using mean replicate population values.

649

650

# Populations

AR

FWA

NARA

NW

TW

bioRxiv preprint doi: <https://doi.org/10.1101/579524>; this version posted June 11, 2019. The copyright holder for this preprint (which was not certified by peer review) is the author/funder, who has granted bioRxiv a license to display the preprint in perpetuity. It is made available under aCC-BY-NC-ND 4.0 International license.

Difference to the control

Age of first reproduction

Early fecundity

Peak fecundity

Generations

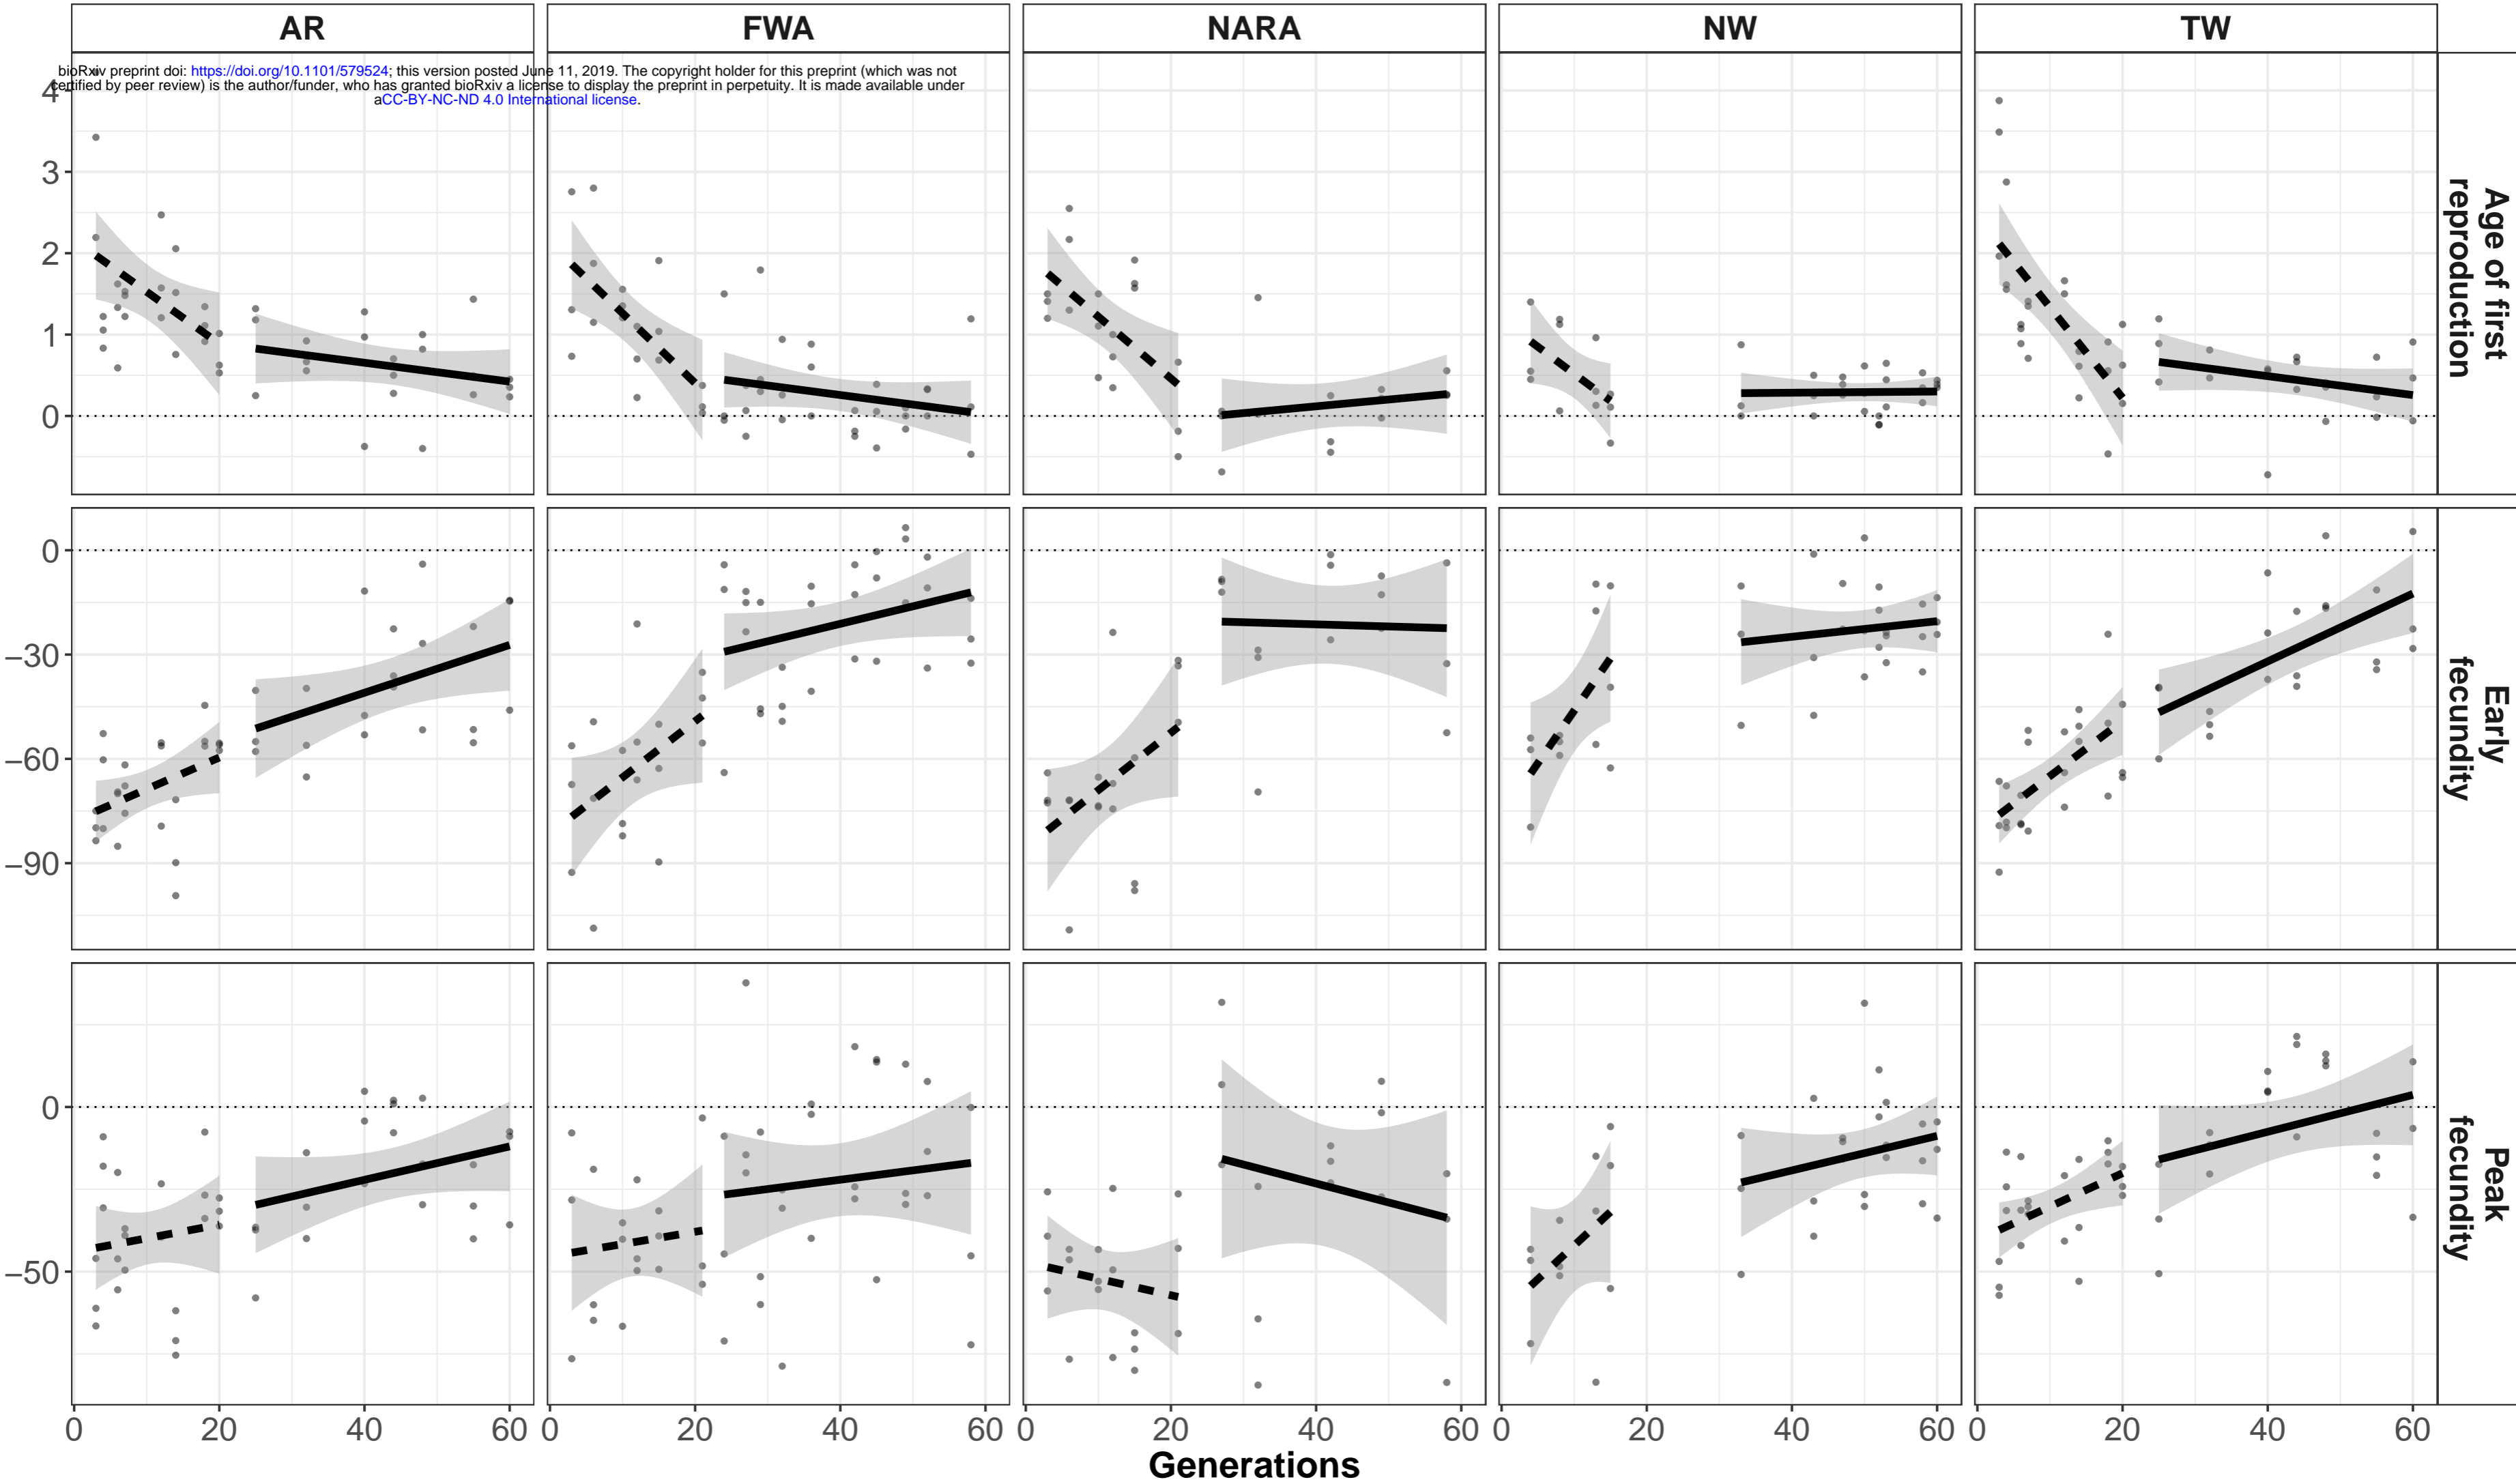

# Populations

bioRxiv preprint doi: <https://doi.org/10.1101/579524>; this version posted June 11, 2019. The copyright holder for this preprint (which was not certified by peer review) is the author/funder, who has granted bioRxiv a license to display the preprint in perpetuity. It is made available under aCC-BY-NC-ND 4.0 International license.

Difference to the control

AR

FWA

NARA

NW

TW

Male starvation resistance

Female starvation resistance

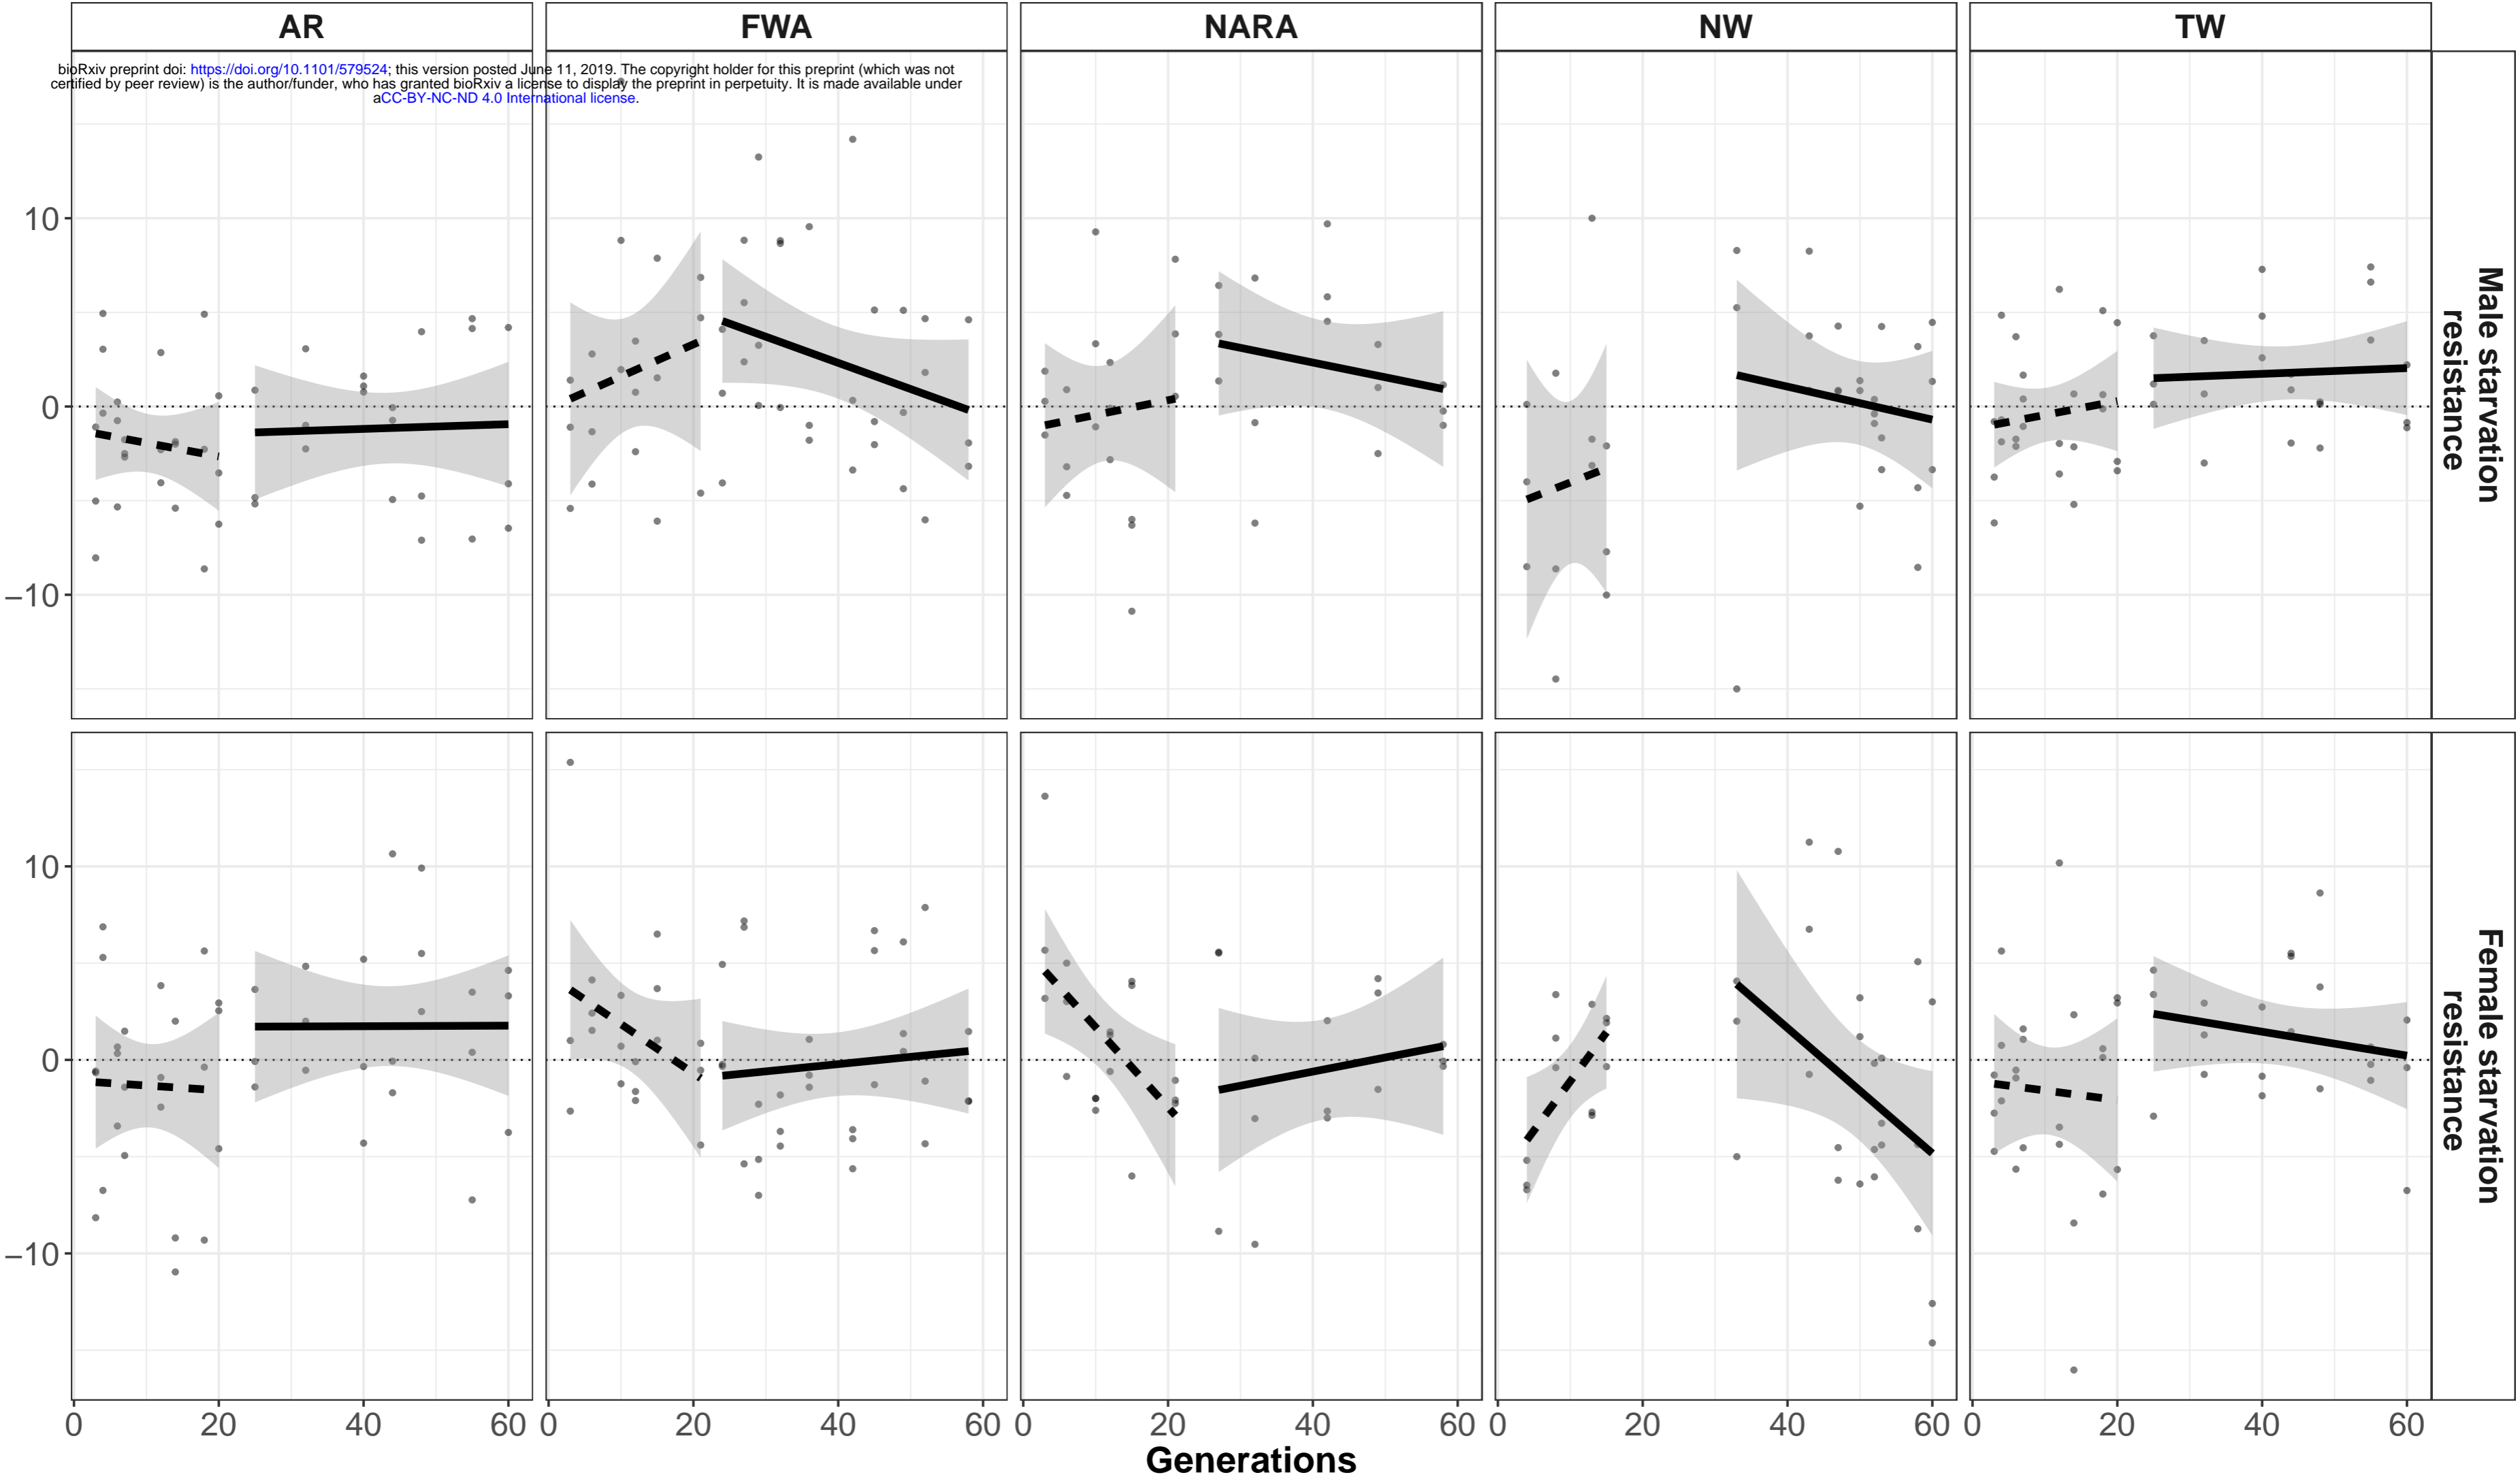

Table 1 - Comparison of evolutionary rates between different years or locations for short or longer periods.

|       | Comparison            | Age First Reprod              | Early Fecundity               | Peak Fecundity                | Fem Starv Resist              | Male Starv Resist             |
|-------|-----------------------|-------------------------------|-------------------------------|-------------------------------|-------------------------------|-------------------------------|
| Short | Arrábida 2001 vs 2005 | 0.7534                        | 0.1462                        | 0.05                          | <b>0.0004</b> <sup>***</sup>  | 0.3682                        |
|       | Sintra 1998 vs 2001   | <b>0.0408</b> <sup>m.s.</sup> | <b>0.0066</b> <sup>*</sup>    | 0.185                         | <b>0.0014</b> <sup>**</sup>   | 0.6638                        |
|       | Sintra 1998 vs 2005   | 0.3634                        | <b>0.0292</b> <sup>m.s.</sup> | <b>0.0392</b> <sup>m.s.</sup> | <b>0</b> <sup>***</sup>       | 0.9202                        |
|       | Sintra 2001 vs 2005   | 0.1888                        | 0.6282                        | 0.189                         | <b>0.0294</b> <sup>m.s.</sup> | 0.4228                        |
|       | Arrábida vs Sintra    | 0.063                         | 0.2862                        | <b>0.0496</b> <sup>n.s.</sup> | 0.4724                        | 0.1286                        |
| Long  | Arrábida 2001 vs 2005 | <b>0.0084</b> <sup>**</sup>   | <b>0.002</b> <sup>**</sup>    | <b>0.0004</b> <sup>***</sup>  | 0.2442                        | 0.191                         |
|       | Sintra 1998 vs 2001   | 0.069                         | <b>0.0014</b> <sup>**</sup>   | 0.1594                        | <b>0.0004</b> <sup>***</sup>  | <b>0.0478</b> <sup>n.s.</sup> |
|       | Sintra 1998 vs 2005   | 0.1188                        | 0.0938                        | 0.7108                        | <b>0.0002</b> <sup>***</sup>  | 0.9632                        |
|       | Sintra 2001 vs 2005   | 0.894                         | <b>0.0396</b> <sup>m.s.</sup> | 0.2322                        | 0.0862                        | <b>0.0106</b> <sup>*</sup>    |
|       | Arrábida vs Sintra    | <b>0.0382</b> <sup>m.s.</sup> | <b>0.0036</b> <sup>**</sup>   | <b>0.0114</b> <sup>*</sup>    | 0.3736                        | 0.6238                        |

Note: P-values were obtained by residual bootstrapping of 10000 samples and estimated the fraction of these samples that were greater than 0 (see Material and Methods for more details). When  $p < 0.05$  (indicated in bold) significance levels after FDR correction are also presented (in superscript): \*\*\*  $p < 0.00044$  ( $\alpha = 0.001$ ); \*\*  $0.00044 < p < 0.0044$  ( $\alpha = 0.01$ ); \*  $0.0044 < p < 0.022$  ( $\alpha = 0.05$ ); m.s.  $0.022 < p < 0.044$  ( $\alpha = 0.1$ ); n.s.  $p > 0.044$  ( $\alpha = 0.1$ )

Table 2 - Comparison of short and long term evolutionary rates between years and locations.

| Comparison            | Age First Reprod | Early Fecundity             | Peak Fecundity               | Fem Starv Resist           | Male Starv Resist |
|-----------------------|------------------|-----------------------------|------------------------------|----------------------------|-------------------|
| Arrábida 2001 vs 2005 | 0.2376           | <b>0.0042</b> <sup>**</sup> | 0.7132                       | <b>0</b> <sup>***</sup>    | 0.1444            |
| Sintra 1998 vs 2001   | 0.1402           | <b>0</b> <sup>***</sup>     | 0.069                        | <b>0</b> <sup>***</sup>    | 0.2288            |
| Sintra 1998 vs 2005   | 0.6716           | <b>0.006</b> <sup>*</sup>   | <b>0.048</b> <sup>n.s.</sup> | <b>0</b> <sup>***</sup>    | 0.9166            |
| Sintra 2001 vs 2005   | 0.238            | 0.1714                      | 0.5928                       | <b>0.0078</b> <sup>*</sup> | 0.0702            |
| Arrábida vs Sintra    | 0.2628           | 0.6254                      | 0.7414                       | 0.2986                     | 0.1144            |

Note: P-values were obtained by residual bootstrapping of 10000 samples and estimated the fraction of these samples that were greater than 0 (see Material and Methods for more details). Significant results are indicated in bold. When  $p < 0.05$  (indicated in bold) significance levels after FDR correction are also presented (in superscript): \*\*\*  $p < 0.00044$  ( $\alpha = 0.001$ ); \*\*  $0.00044 < p < 0.0044$  ( $\alpha = 0.01$ ); \*  $0.0044 < p < 0.022$  ( $\alpha = 0.05$ ); m.s.  $0.022 < p < 0.044$  ( $\alpha = 0.1$ ); n.s.  $p > 0.044$  ( $\alpha = 0.1$ )
